# Supplementary material for: Improvement of in vitro-transcribed amber suppressor tRNAs toward higher suppression efficiency in wheat germ extract
Source: Royal Society of Chemistry journal article supplement (doi:10.1039/c1ob06351k), 2011-01-01
Supplement: c1ob06351k.pdf [file c1ob06351k.pdf]

## Electronic Supplementary Information

For

# **Improvement of *In Vitro*-Transcribed Amber Suppressor tRNAs toward Higher Suppression Efficiency in Wheat Germ Extract**

*Atsushi Ogawa\**, *Yasunori Doi*, *Nobuto Matsushita*

*\*Senior Research Fellow Center, Ehime University, 3 Bunkyo-cho, Matsuyama, Ehime 790-8577,*

*Japan*

### **CONTENTS:**

- Primers and Templates for PCR. (p. S2)**
- tRNA sequences in the first generation (p. S12)**
- Doubly Chimeric IVT-sup-tRNAs. (Figure S1; p. S14)**
- Effect of the 31-39 Base Pair in S1-2AC<sub>1a</sub> (Figure S2; p. S15)**

## Primers and Templates for PCR.

Forward primer for the amber and amber-free templates

CATACGATTTAGGTGACACT

Reverse primer for the amber and amber-free templates

TTAGCGGCTTTATTGATTGC

Plasmid sequences as PCR templates for the amber and amber-free templates (only the region to be amplified is shown)

(XXX = TAG for pHis-TAG-RY-YPet, TCT for pHis-SRY-YPet; shaded: SP6 promoter; underlined: priming sites; red: start and stop codons)

...CATACGATTTAGGTGACACTATAGAACTCACCTATCTCCCCAACACCTAATAACAT  
TCAATCACTCTTTCCACTAACCACCTATCTACATCACCAAGATATCACTAGTATGCGC  
CCATCACCATCACCATCATXXXAGATACAGCAGCGGCCTGGTGCCGCGCGGCAGC  
CACATGGTGAGCAAGGGCGAGGAGCTGTTCAACGGGGTGGTGCCCATCCTGGTCCG  
AGCTGGACGGCGACGTGAACGGCCACAAGTTCAGCGTGTCCGGCGAGGGCGAGG  
GCGATGCCACCTACGGCAAGCTGACCCTGAAGCTGCTGTGCACCACCGGCAAGCT  
GCCCCGTGCCCTGGCCCACCCTCGTGACCACCCTGGGCTACGGCGTGCAGTGCTTC  
GCCCCGTACCCCGACCACATGAAGCAGCAGACTTCTTCAAGTCCGCCATGCCCGA  
AGGCTACGTCCAGGAGCGCACCATCTTCTTCAAGGACGACGGCAACTACAAGACC  
CGCGCCGAGGTGAAGTTCGAGGGCGACACCCTGGTGAACCGCATCGAGCTGAAGG  
GCATCGACTTCAAGGAGGACGGCAACATCCTGGGGCACAAGCTGGAGTACAATA  
CAACAGCCACAACGTCTATATCACCGCCGACAAGCAGAAGAACGGCATCAAGGCC  
AACTTCAAGATCCGCCACAACATCGAGGACGGCGGCGTGCAGCTCGCCGACCACT  
ACCAGCAGAACACCCCATCGGGCAGCGGCCCGTGTGCTGCCCGACAACCACTA  
CCTGAGCTACCAGTCCGCCCTGTTCAAAGACCCCAACGAGAAGCGCGATCACATG  
GTCCTGCTGGAGTTCCTGACCGCCGCGGGATCACTGAGGGCATGAACGAGCTGT  
ACAAGTAACTCGAGCTCCTGGGCCTCATGGGCCTTCCTTTCACTGCCCGCTTTCCA  
GTCGGGAAACCTGTCTGTGCCAGCTGCATTAACATGGTCATAGCTGTTTCCTTGCGT  
ATTGGGCGCTCTCCGCTTCCTCGCTCACTGACTCGCTGCGCTCGGTCTGTTCCGGTA  
AAGCCTGGGGTGCCTAATGAGCAAAAGGCCAGCAAAAGGCCAGGAACCGTAAAAA  
GGCCGCGTTGCTGGCGTTTTTCCATAGGCTCCGCCCCCTGACGAGCATCACAAAA  
ATCGACGCTCAAGTCAGAGGTGGCGAAACCCGACAGGACTATAAAGATAACCAGGC  
GTTTCCCCCTGGAAGCTCCCTCGTGCGCTCTCCTGTTCCGACCCTGCCGCTTACCG  
GATACCTGTCCGCCTTTCTCCCTTCGGGAAGCGTGGCGCTTTCTCATAGCTCACGC  
TGTAGGTATCTCAGTTCGGTGTAGGTCGTTCCGCTCCAAGCTGGGCTGTGTGCACGA  
ACCCCCGTTACGCCGACCGCTGCGCCTTATCCGGTAACTATCGTCTTGAGTCCA

ACCCGGTAAGACACGACTTATCGCCACTGGCAGCAGCCACTGGTAACAGGATTAGC  
AGAGCGAGGTATGTAGGCGGTGCTACAGAGTTCTTGAAGTGGTGGCCTAACTACG  
GCTACACTAGAAGAACAGTATTTGGTATCTGCGCTCTGCTGAAGCCAGTTACCTTC  
GGAAAAAGAGTTGGTAGCTCTTGATCCGGCAAACAAACCACCGCTGGTAGCGGTG  
GTTTTTTTGTGTTGCAAGCAGCAGATTACGCGCAGAAAAAAGGATCTCAAGAAGAT  
CCTTTGATCTTTTCTACGGGGTCTGACGCTCAGTGGAACGAAAACCTCACGTTAAGG  
GATTTTGGTCATGAGATTATCAAAAAGGATCTTCACCTAGATCCTTTTAAATTAATA  
ATGAAGTTTTAAATCAATCTAAAGTATATATGAGTAAACTTGGTCTGACAGTTATTAG  
AAAAATTCATCCAGCAGACGATAAACGCAATACGCTGGCTATCCGGTGCCGCAAT  
GCCATACAGCACCAGAAAACGATCCGCCATTCCGCCGCCAGTTCTTCCGCAATAT  
CACGGGTGGCCAGCGCAATATCCTGATAACGATCCGCCACGCCAGACGGCCGCA  
ATCAATAAAGCCGCTAA...

Forward primer for S1, S3, S1-2V, S1-2AC<sub>[a]</sub>-X except for S1-2AC<sub>[a]</sub>-G<sub>27</sub>C<sub>43</sub>-2A-G<sub>73</sub>,  
S1-2AC<sub>[b]</sub>, S1-U<sub>26</sub>, S1-U<sub>31A39</sub>, dc6<sub>[a]</sub>, and dc6<sub>[b]</sub>

GAAATTAATACGACTCACTATAGTCGATATGTCCGAGTG

Reverse primer for S1, S1-2AC<sub>[a]</sub>-X except for S1-2AC<sub>[a]</sub>-G<sub>27</sub>C<sub>43</sub>-2A-G<sub>73</sub>, S1-2AC<sub>[b]</sub>, S1-U<sub>26</sub>,  
and S1-U<sub>31A39</sub>

TGGCGTCGACAGCAGGATTCGAACCTGCGCAGGCAAAG

Template for S1

GTCGATATGTCCGAGTGGTTAAGGAGACAGACTCTAAATCTGTTGGGCTTTGCCTG  
CGCAGGTTCGAATCCTGCTGTCTG

Forward primer for S2, S7, S2-1V, S2-1AC<sub>[a]</sub>, S2-1AC<sub>[b]</sub>, S2-G<sub>73</sub>, S2-G<sub>27</sub>C<sub>43</sub>-G<sub>73</sub>, dc1<sub>[a]</sub>,  
and dc1<sub>[b]</sub>

GAAATTAATACGACTCACTATAGGAGAGATGGCTGAGTG

Reverse primer for S2, S2-1AC<sub>[a]</sub>, and S2-1AC<sub>[b]</sub>

TGGAGGAGAGAGAGGGATTCGAACCCTCGATAGTTC

Template for S2 and S2-G<sub>73</sub>

GGAGAGATGGCTGAGTGGTTGATAGCTCCGGTCTCTAAAACCGGTATAGTTCTAGG  
AACTATCGAGGGTTCGAATCCCT

Reverse primer for S3

TGGCGTCGACAGCAGGGTTCGAACCTGCGCGGGCGAAG

Template for S3

GTCGATATGTCCGAGTGGTTAAGGAGACAGACTCTAAATCTGTTGGGCTTCGCCCCG

CGCAGGTTCGAACCTGCTGTCG

Forward primer for S4

GAAATTAATACGACTCACTATAGTGGTCGTGCCGGAG

Reverse primer for S4

TGGCGTGGTCGGCAGGATTCGAACCTGCGCGGGCAAAG

Template for S4

GTGGTCGTGCCGGAGTGGTTATCGGGCATGACTCTAAATCATGTGGGCTTTGCCCG

CGCAGGTTCGAATCCTGCCGACC

Forward primer for S5

GAAATTAATACGACTCACTATAGGAGAGATGGCCGAG

Reverse primer for S5

TGGCGGAAAGAGAGGGATTCGAACCCTCGGTAAAC

Template for S5

GGAGAGATGGCCGAGCGGTTCAAGGCGTAGCATTCTAACTGCTATGTAGACTTTTG

TTTACCGAGGGTTCGAATCCCTC

Forward primer for S6

GAAATTAATACGACTCACTATAGACGCTTTGGCCGAGTGG

Reverse primer for S6

TGGCGACGCCTGAGAGATTCGAAC

Template for S6

GACGCTTTGGCCGAGTGGTTAAGGCGTGTGCCTCTAAAGTACATGGGGTTTCCCCG

CGAGAGTTCGAATCTCTCAGGCG

Reverse primer for S7

TGGCGGAAAGAGAGGGATTCGAACCCTCGGTACAAAAAATTG

Template for S7

GGAGAGATGGCTGAGTGGACTAAAGCGGCGGATTCTAAATCCGTTGTACAATTTTT

TTGTACCGAGGGTTCGAATCCCT

Forward primer for L1 and A4

GAAATTAATACGACTCACTATAGTCAAGATGGCCGAG

Reverse primer for L1 and A4

TGGTGTCAAGAATGGGATTCGAACCCATG

Template for L1

GTCAAGATGGCCGAGTTGGTCTAAGGCGCCAGTTTCTAGTACTGGTCCGAAAGGG  
CATGGGTTCGAATCCCATCTTGA

Forward primer for L2

GAAATTAATACGACTCACTATAGCCGCCATGGTGAAATTG

Reverse primer for L2

TGGTGCCGCCACTCGGACTCGAACCGAGATGCTTG

Template for L2

GCCGCCATGGTGAAATTGGTAGACACGCTGCTCTCTAGAAGCAGTGCTCAAGCATC  
TCGGTTCGAGTCCGAGTGGCGGC

Forward primer for L3

GAAATTAATACGACTCACTATAGACAGTTTGGCCGAG

Reverse primer for L3

TGGTGACAGCTGTGGGATTTGAACCCACGCCCTTTC

Template for L3

GACAGTTTGGCCGAGTGGTCTAAGGCGCCAGATTCTAGCTCTGGTCCGAAAGGGC  
GTGGGTTCAAATCCCACAGCTGTC

Forward primer for L4

GAAATTAATACGACTCACTATAGTTGAGATGGCCGAG

Reverse primer for L4

TGGTGTTGAGAGTGGGATTTGAACCCACGCCCTTTC

Template for L4

GTTGAGATGGCCGAGTTGGTCTAAGGCGCCAGATTCTAGTTCTGGTCCGAAAGGG  
CGTGGGTTCAAATCCCACACTCTCAA

Forward primer for L5

GAAATTAATACGACTCACTATAGCCTTGATGGTGAAATG

Reverse primer for L5

TGGTGCCCTTGAAGAGGACTCGAACCTCCACGCTC

Template for L5

GCCTTGATGGTGAAATGGTAGACACGCGAGACTCTAAATCTCGTGCTAAAGAGCGT  
GGAGGTTTCGAGTCCTCTTCAAGG

Forward primer for L6

GAAATTAATACGACTCACTATAGTCAGGATGGCCGAGTG

Reverse primer for L6

TGGTGTCAAGAAGTGGGATTTGAACCCACGCCCTCGTTAG

Template for L6

GTCAGGATGGCCGAGTGGTCTAAGGCGCCAGACTCTAGTTCTGGTCCTCTAACGA  
GGGCGTGGGTTCAAATCCCCTTC

Forward primer for L7

GAAATTAATACGACTCACTATAGCTGGTTTGCCCGAGTG

Reverse primer for L7

TGGTGCTGGCTGTGGGGTTCGAACCCACGCGCACTTC

Template for L7

GCTGGTTTGCCCGAGTGGTTAAGGGGAAGACTCTAGATCTTCTGCACTGAAGTG  
CGCGTGGGTTTGAACCCACAGCC

Forward primer for A1

GAAATTAATACGACTCACTATAGGGGACGTAGCTCATATG

Reverse primer for A1

TGGTGGAGACGCGGGGAATCGAACCCCGTGCCTCTC

Template for A1

GGGGACGTAGCTCATATGGTAGAGCGCTCGCTTCTAATGCGAGAGGCACGGGGTT  
CGATTCCCCGCGTCTCCACCA

Forward primer for A2

GAAATTAATACGACTCACTATAGGGGATGTAGCTCAAATG

Reverse primer for A2

TGGTGGAGATGCGGGGGATCGAACCCCGTG

Template for A2

GGGGATGTAGCTCAAATGGTAGAGCGCTCGCTTCTAATGCGAGAGGCACGGGGTT  
CGATCCCCCGCATCTCCACCA

Forward primer for A3

GAAATTAATACGACTCACTATAGGGGATGTAGCTCAG

Reverse primer for A3

TGGTGGAGATGCGGGGTATCGATCCCCGTAC

Template for A3

GGGGATGTAGCTCAGATGGTAGAGCGCTCGCTTCTAATGCGAGAGGTACGGGGAT  
CGATACCCCGCATCTCCACCA

Template for A4

GTCAAGATGGCCGAGTTGGTCTAAGGCGCCAGTTTCTAAAATTTTCATTGGCATGGG  
TTCGAATCCCATTCTTGACACCA

Forward primer for S1-2A, S2-1DT<sub>[a]</sub>, S2-1DT<sub>[b]</sub>, S1-2AC<sub>[a]</sub>-G<sub>27</sub>C<sub>43</sub>-2A-G<sub>73</sub>, dc2<sub>[a]</sub>, dc2<sub>[b]</sub>,  
and dc3

GAAATTAATACGACTCACTATAGGAGAGATGTCCGAGTG

Reverse primer for S1-2A, dc2<sub>[a]</sub>, and dc2<sub>[b]</sub>

TGGAGGAGAGAGCAGGATTCGAACCTGCGCAGGCAAAG

Template for S1-2A

GGAGAGATGTCCGAGTGGTTAAGGAGACAGACTCTAAATCTGTTGGGCTTTGCCTG  
CGCAGGTTCGAATCCTGCTCTCT

Reverse primer for S1-2V, dc6<sub>[a]</sub>, and dc6<sub>[b]</sub>

TGGCGTCGACAGCAGGATTCGAACCTGCGATAGTTC

Template for S1-2V

GTCGATATGTCCGAGTGGTTAAGGAGACAGACTCTAAATCTGTTATAGTTCTAGGA  
ACTATCGCAGGTTCGAATCCTGC

Forward primer for S1-2DT<sub>[a]</sub>, S1-2DT<sub>[b]</sub>, S2-1A, S2-1A-U<sub>73</sub>, dc4, dc5<sub>[a]</sub>, and dc5<sub>[b]</sub>

GAAATTAATACGACTCACTATAGTCGATATGGCTGAGTG

Reverse primer for S1-2DT<sub>[a]</sub>, S1-2DT<sub>[b]</sub>, and dc4

TGGCGTCGACAGAGGGATTCGAACCCTCGCAGGCAAAG

Template for S1-2DT<sub>[a]</sub>

GTCGATATGGCTGAGTGGTTGATAGCGACAGACTCTAAATCTGTTGGGCTTTGCCT  
GCGAGGGTTTCGAATCCCTCTGTC

Template for S1-2DT<sub>[b]</sub>

GTCGATATGGCTGAGTGGTTGATAGCTACAGACTCTAAATCTGTTGGGCTTTGCCT  
GCGAGGGTTTCGAATCCCTCTGTC

Template for S1-2AC<sub>[a]</sub>

GTCGATATGTCCGAGTGGTTAAGGATCCGGTCTCTAAAACCGGTGGGCTTTGCCTG

CGCAGGTTCGAATCCTGCTGTCTG

Template for S1-2AC<sub>[b]</sub>

GTCGATATGTCCGAGTGGTTAAGGAGCCGGTCTCTAAAACCGGTGGGCTTTGCCTG

CGCAGGTTCGAATCCTGCTGTCTG

Reverse primer for S2-1A, dc5<sub>[a]</sub>, and dc5<sub>[b]</sub>

TGGCGTCGACAGAGGGATTCTGAACCCTCGATAGTTC

Template for S2-1A and S2-1A-U<sub>73</sub>

GTCGATATGGCTGAGTGGTTGATAGCTCCGGTCTCTAAAACCGGTATAGTTCTAGG

AACTATCGAGGGTTCGAATCCCT

Reverse primer for S2-1V, dc1<sub>[a]</sub>, and dc1<sub>[b]</sub>

TGGAGGAGAGAGAGGGATTCTGAACCCTCGCAGGCAAAG

Template for S2-1V

GGAGAGATGGCTGAGTGGTTGATAGCTCCGGTCTCTAAAACCGGTGGGCTTTGCC

TGCGAGGGTTCGAATCCCTCTCTC

Reverse primer for S2-1DT<sub>[a]</sub>, S2-1DT<sub>[b]</sub>, and dc3

TGGAGGAGAGAGCAGGATTCTGAACCCTGCGATAGTTC

Template for S2-1DT<sub>[a]</sub>

GGAGAGATGTCCGAGTGGTTAAGGATCCGGTCTCTAAAACCGGTATAGTTCTAGGA

ACTATCGCAGGTTCTGAATCCTGC

Template for S2-1DT<sub>[b]</sub>

GGAGAGATGTCCGAGTGGTTAAGGAGCCGGTCTCTAAAACCGGTATAGTTCTAGGA

ACTATCGCAGGTTCTGAATCCTGC

Template for S2-1AC<sub>[a]</sub>

GGAGAGATGGCTGAGTGGTTGATAGCGACAGACTCTAAATCTGTTATAGTTCTAGG

AACTATCGAGGGTTCGAATCCCT

Template for S2-1AC<sub>[b]</sub>

GGAGAGATGGCTGAGTGGTTGATAGCTACAGACTCTAAATCTGTTATAGTTCTAGG

AACTATCGAGGGTTCGAATCCCT

Template for S1-2AC<sub>[a]</sub>-G<sub>27</sub>C<sub>43</sub>

GTCGATATGTCCGAGTGGTTAAGGATGCGGTCTCTAAAACCGCTGGGCTTTGCCTG

CGCAGGTTCTGAATCCTGCTGTCTG



Template for S1-2AC<sub>[a]</sub>-C<sub>29</sub>G<sub>41</sub>

GTCGATATGTCCGAGTGGTTAAGGATCCCGTCTCTAAAACGGGTGGGCTTTGCCTG  
CGCAGGTTCGAATCCTGCTGCTCG

Template for S1-2AC<sub>[a]</sub>-G<sub>27</sub>C<sub>43</sub>-C<sub>29</sub>G<sub>41</sub>

GTCGATATGTCCGAGTGGTTAAGGATGCCGTCTCTAAAACGGGTGGGCTTTGCCTG  
CGCAGGTTCGAATCCTGCTGCTCG

Template for S1-2AC<sub>[a]</sub>-U<sub>27</sub>A<sub>43</sub>-U<sub>29</sub>A<sub>41</sub>

GTCGATATGTCCGAGTGGTTAAGGATTCTGTCTCTAAAACAGATGGGCTTTGCCTG  
CGCAGGTTCGAATCCTGCTGCTCG

Template for S1-2AC<sub>[a]</sub>-A<sub>27</sub>U<sub>43</sub>-A<sub>29</sub>U<sub>41</sub>

GTCGATATGTCCGAGTGGTTAAGGATAACAGTCTCTAAAACGTTGGGCTTTGCCTG  
CGCAGGTTCGAATCCTGCTGCTCG

Template for S1-2AC<sub>[a]</sub>-A<sub>31</sub>U<sub>39</sub>

GTCGATATGTCCGAGTGGTTAAGGATCCGGACTCTAAATCCGGTGGGCTTTGCCTG  
CGCAGGTTCGAATCCTGCTGCTCG

Template for S1-U<sub>26</sub>

GTCGATATGTCCGAGTGGTTAAGGATAACAGACTCTAAATCTGTTGGGCTTTGCCTG  
CGCAGGTTCGAATCCTGCTGCTCG

Template for S1-U<sub>31</sub>A<sub>39</sub>

GTCGATATGTCCGAGTGGTTAAGGAGACAGTCTCTAAAACGTTGGGCTTTGCCTG  
CGCAGGTTCGAATCCTGCTGCTCG

Reverse primer for S2-G<sub>73</sub> and S2-G<sub>27</sub>C<sub>43</sub>-G<sub>73</sub>

TGGCGGAGAGAGAGGGATTCTGAACCCTCGATAGTTC

Reverse primer for S2-1A-U<sub>73</sub>

TGGAGTCGACAGAGGGATTCTGAACCCTCGATAGTTC

Reverse primer for S1-2AC<sub>[a]</sub>-G<sub>27</sub>C<sub>43</sub>-2A-G<sub>73</sub>

TGGCGGAGAGAGCAGGATTCGAACCTGCGCAGGCAAAG

Template for S1-2AC<sub>[a]</sub>-G<sub>27</sub>C<sub>43</sub>-2A-G<sub>73</sub>

GGAGAGATGTCCGAGTGGTTAAGGATGCGGTCTCTAAAACCGCTGGGCTTTGCCT  
GCGCAGGTTTGAATCCTGCTCTCT

Template for S2-G<sub>27</sub>C<sub>43</sub>-G<sub>73</sub>

GGAGAGATGGCTGAGTGGTTGATAGCTGCGGTCTCTAAAACCGCTATAGTTCTAGG  
AACTATCGAGGGTTTGAATCCCT

Reverse primer for S2-G<sub>27</sub>C<sub>43</sub>-G<sub>73</sub> with 3' tuning

TXGCGGAGAGAGAGGGATTCGAACCCTCGATAGTTC

(X = 2'-OMe-G)

Template for dc1<sub>[a]</sub>

GGAGAGATGGCTGAGTGGTTGATAGCGACAGACTCTAAATCTGTTGGGCTTTGCCT  
GCGAGGGTTTGAATCCCTCTCTC

Template for dc1<sub>[b]</sub>

GGAGAGATGGCTGAGTGGTTGATAGCTACAGACTCTAAATCTGTTGGGCTTTGCCT  
GCGAGGGTTTGAATCCCTCTCTC

Template for dc2<sub>[a]</sub>

GGAGAGATGTCCGAGTGGTTAAGGATCCGGTCTCTAAAACCGGTGGGCTTTGCCT  
GCGCAGGTTTGAATCCTGCTCTCT

Template for dc2<sub>[b]</sub>

GGAGAGATGTCCGAGTGGTTAAGGAGCCGGTCTCTAAAACCGGTGGGCTTTGCCT  
GCGCAGGTTTGAATCCTGCTCTCT

Template for dc3

GGAGAGATGTCCGAGTGGTTAAGGAGACAGACTCTAAATCTGTTATAGTTCTAGGA  
ACTATCGCAGGTTTGAATCCCTGC

Template for dc4

GTCGATATGGCTGAGTGGTTGATAGCTCCGGTCTCTAAAACCGGTGGGCTTTGCCT  
GCGAGGGTTTGAATCCCTCTGTC

Template for dc5<sub>[a]</sub>

GTCGATATGGCTGAGTGGTTGATAGCGACAGACTCTAAATCTGTTATAGTTCTAGGA  
ACTATCGAGGGTTCGAATCCCT

Template for dc5<sub>[b]</sub>

GTCGATATGGCTGAGTGGTTGATAGCTACAGACTCTAAATCTGTTATAGTTCTAGGA  
ACTATCGAGGGTTCGAATCCCT

Template for dc6<sub>[a]</sub>

GTCGATATGTCCGAGTGGTTAAGGATCCGGTCTCTAAAACCGGTATAGTTCTAGGA  
ACTATCGCAGGTTCGAATCCTGC

Template for dc6<sub>[b]</sub>

GTCGATATGTCCGAGTGGTTAAGGAGCCGGTCTCTAAAACCGGTATAGTTCTAGGA  
ACTATCGCAGGTTCGAATCCTGC

Template for S1-2AC<sub>[a]</sub>-G<sub>31</sub>C<sub>39</sub>

GTCGATATGTCCGAGTGGTTAAGGATCCGGGCTCTAAACCCGGTGGGCTTTGCCTG  
CGCAGGTTCGAATCCTGCTGTCTG

Template for S1-2AC<sub>[a]</sub>-C<sub>31</sub>G<sub>39</sub>

GTCGATATGTCCGAGTGGTTAAGGATCCGGCCTCTAAAGCCGGTGGGCTTTGCCTG  
CGCAGGTTCGAATCCTGCTGTCTG

Template for S1-2AC<sub>[a]</sub>-G<sub>31</sub>U<sub>39</sub>

GTCGATATGTCCGAGTGGTTAAGGATCCGGGCTCTAAATCCGGTGGGCTTTGCCTG  
CGCAGGTTCGAATCCTGCTGTCTG

Template for S1-2AC<sub>[a]</sub>-U<sub>31</sub>G<sub>39</sub>

GTCGATATGTCCGAGTGGTTAAGGATCCGGTCTCTAAAGCCGGTGGGCTTTGCCTG  
CGCAGGTTCGAATCCTGCTGTCTG

Forward primer for eRF aptamer

GGAAATTAATACGACTCACTATAGGGAGCTCAGAATAAACGCTCA

Reverse primer for eRF aptamer

GCAGGATCCGTGTCTCATGTCTG

Template for eRF aptamer

GGGAGCTCAGAATAAACGCTCAAGTACCTGAAAATGGGAAGCAGAGCGAGCCTTT  
CGACATGAGACACGGATCCTGC

**tRNA sequences in the first generation.**

S1:GUCGAUAUGUCCGAGUGGUUAAGGAGACAGACUCUAAAUCUGUUGGGCUU  
UGCCUGCGCAGGUUCGAAUCCUGCUGUCGACGCCA

S2:GGAGAGAUGGCUGAGUGGUUGAUAGCUCGGUCUCUAAAACCGGUAUAGU  
UCUAGGAACUAUCGAGGGUUCGAAUCCUCUCUCUCCUCCA

S3:GUCGAUAUGUCCGAGUGGUUAAGGAGACAGACUCUAAAUCUGUUGGGCUU  
CGCCCGCGCAGGUUCGAAUCCUGCUGUCGACGCCA

S4:GUGGUCGUGCCGGAGUGGUUAUCGGGCAUGACUCUAAAUCAUGUGGGCUU  
UGCCCGCGCAGGUUCGAAUCCUGCCGACCACGCCA

S5:GGAGAGAUGGCCGAGCGGUUCAAGGCGUAGCAUUCUAAACUGCUAUGUAGAC  
UUUUGUUUACCGAGGGUUCGAAUCCUCUCUUUCCGCCA

S6:GACGCUUUGGCCGAGUGGUUAAGGCGUGUGCCUCUAAAGUACAUGGGGUU  
UCCCGCGAGAGUUCGAAUCUCUCAGGCGUCGCCA

S7:GGAGAGAUGGCUGAGUGGACUAAAGCGGCGGAUUCUAAAUCCGUUGUACAA  
UUUUUUUGUACCGAGGGUUCGAAUCCUCUCUUUCCGCCA

L1:GUCAAGAUGGCCGAGUUGGUCUAAGGCGCCAGUUUCUAGUACUGGUCCGAA  
AGGGCAUGGGUUCGAAUCCAUUCUUGACACCA

L2:GCCGCCAUGGUGAAAUUGGUAGACACGCUGCUCUCUAGAAGCAGUGCUCAA  
GCAUCUCGGUUCGAGUCCGAGUGGCGGCACCA

L3:GACAGUUUGGCCGAGUGGUCUAAGGCGCCAGAUUCUAGCUCUGGUCCGAAA  
GGGCGUGGGUUCAAAUCCACAGCUGUCACCA

L4:GUUGAGAUGGCCGAGUUGGUCUAAGGCGCCAGAUUCUAGUUCUGGUCCGA  
AAGGGCGUGGGUUCAAAUCCACUCUCAACACCA

L5:GCCUUGAUGGUGAAAUGGUAGACACGCGAGACUCUAAAUCUCGUGC UAAAG  
AGCGUGGAGGUUCGAGUCCUCUUAAGGCACCA

L6:GUCAGGAUGGCCGAGUGGUCUAAGGCGCCAGACUCUAGUUCUGGUCCUCUA  
ACGAGGGCGUGGGUUCAAAUCCACUUCUGACACCA

L7:GCUGGUUUGCCCGAGUGGUUAAGGGGGAAGACUCUAGAUCUUCUGCACUG  
AAGUGCGCGUGGGUUCGAAUCCACAGCCAGCACCA

A1:GGGGACGUAGCUCAUAUGGUAGAGCGCUCGCUUCUAAUGCGAGAGGCACGG  
GGUUCGAUUCGGCGUCUCCACCA

A2:GGGGAUGUAGCUCAAUUGGUAGAGCGCUCGCUUCUAAUGCGAGAGGCACGG  
GGUUCGAUUCGGCGAUUCUCCACCA

A3:GGGGAUGUAGCUCAGAUGGUAGAGCGCUCGCUUCUAAUGCGAGAGGUACG  
GGGAUCGAUACCCCGCAUCUCCACCA  
A4:GUCAAGAUGGCCGAGUUGGUCUAAGGCGCCAGUUUCUAAAAUUUCAUUGG  
CAUGGGUUCGAAUCCCAUUCUUGACACCA

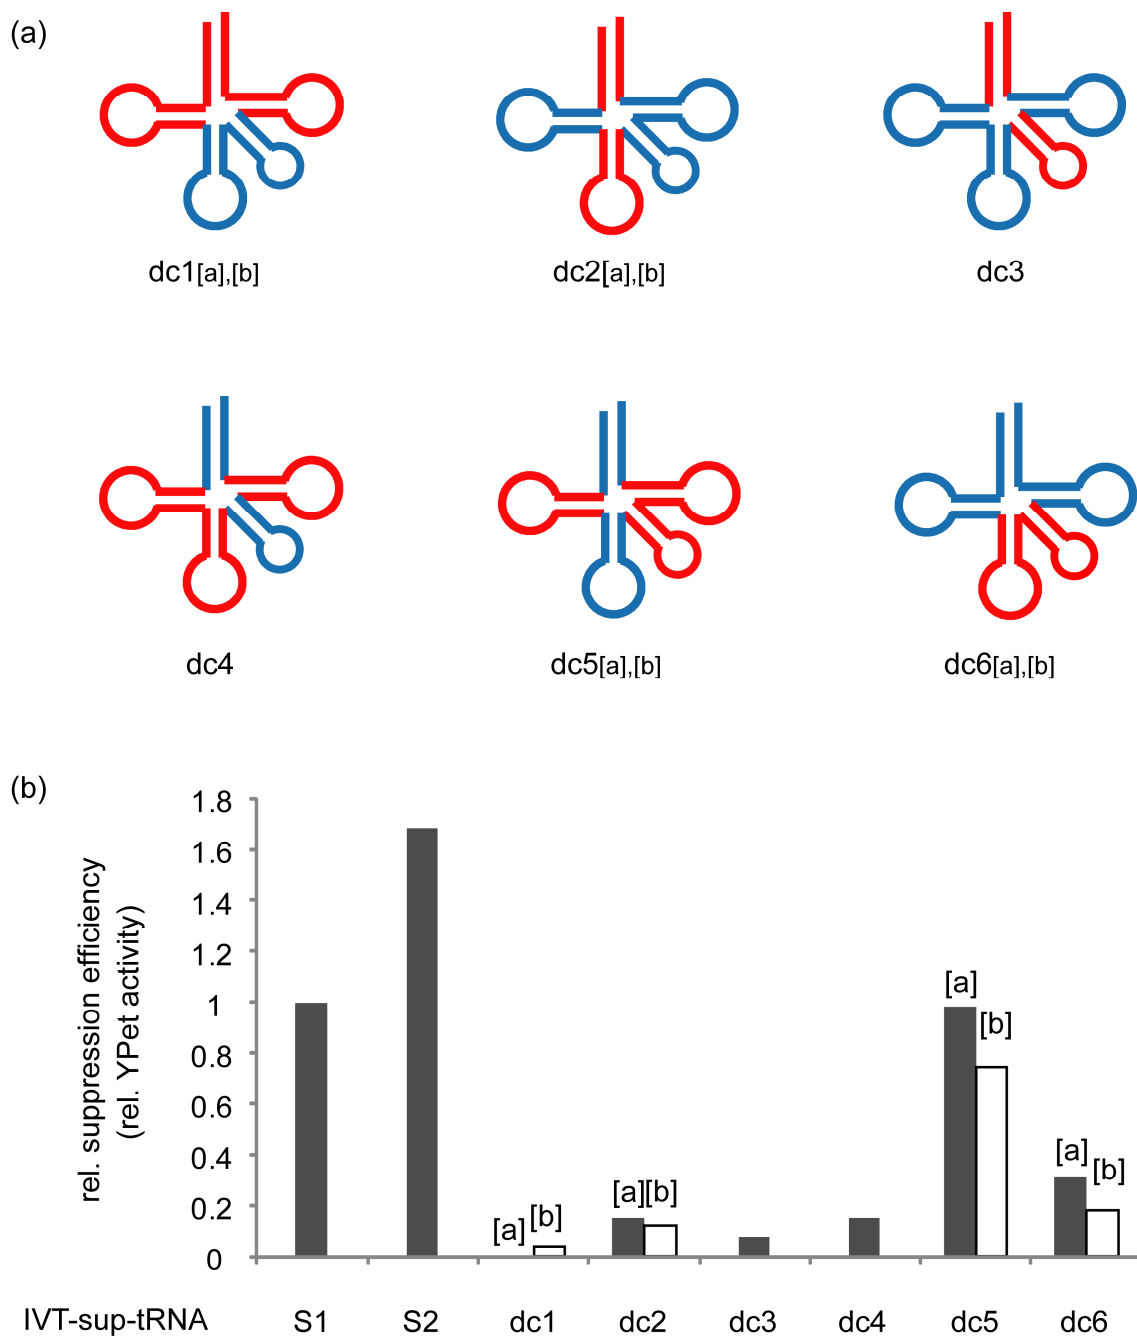

**Fig. S1** Doubly chimeric IVT-sup-tRNAs. (a) Schematic diagrams of the IVT-sup-tRNAs. The blue and red lines show bases derived from S1 and S2, respectively. (b) Relative suppression efficiency of doubly chimeric IVT-sup-tRNAs to S1.

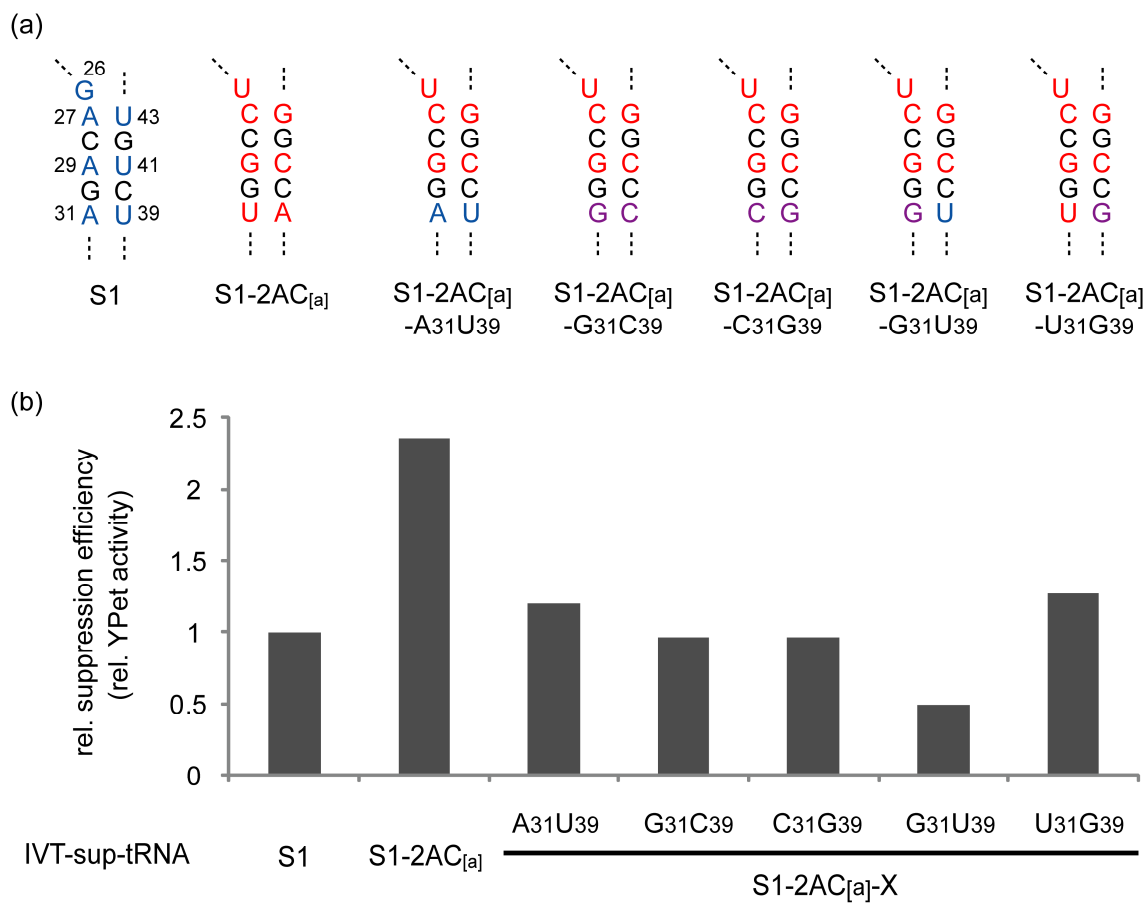

**Fig. S2** Effect of the 31-39 base pair in S1-2AC<sub>[a]</sub> on suppression efficiency. (a) The sequences of the anticodon-stem and the 26th base in various S1-2AC<sub>[a]</sub>-based IVT-sup-tRNAs. The letter colours have the same meaning as in Fig. 3. (b) Relative suppression efficiency of IVT-sup-tRNAs to S1.
